# Supplementary material for: Removal of Methylene Blue from Aqueous Solution by Mixture of Reused Silica Gel Desiccant and Natural Sand or Eggshell Waste
Source: MDPI journal article supplement (doi:10.3390/ma16041618), 2023-02-15
Supplement: s1 [file s1]

## Supplementary Materials

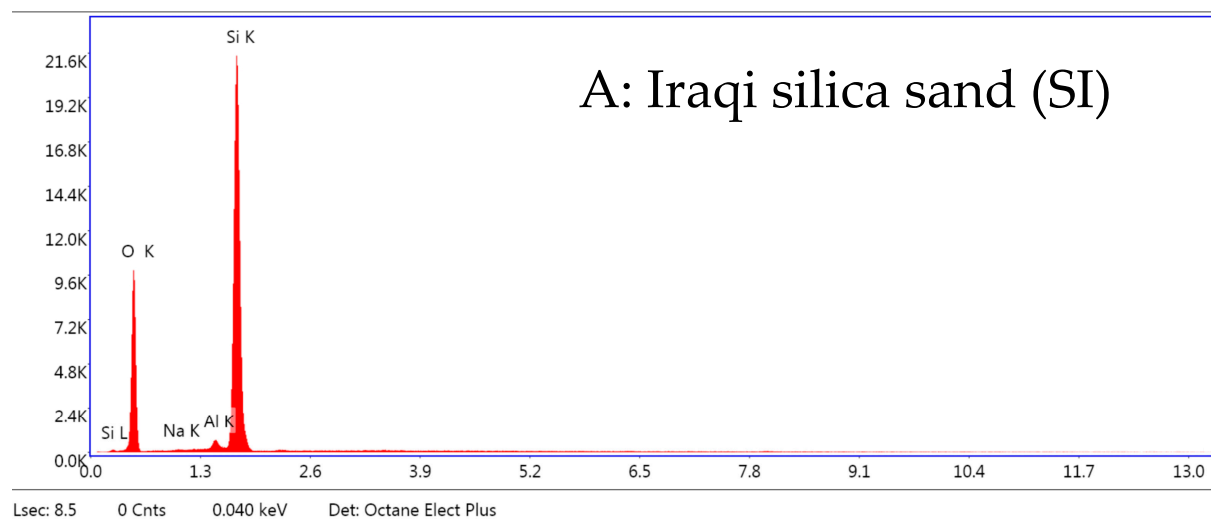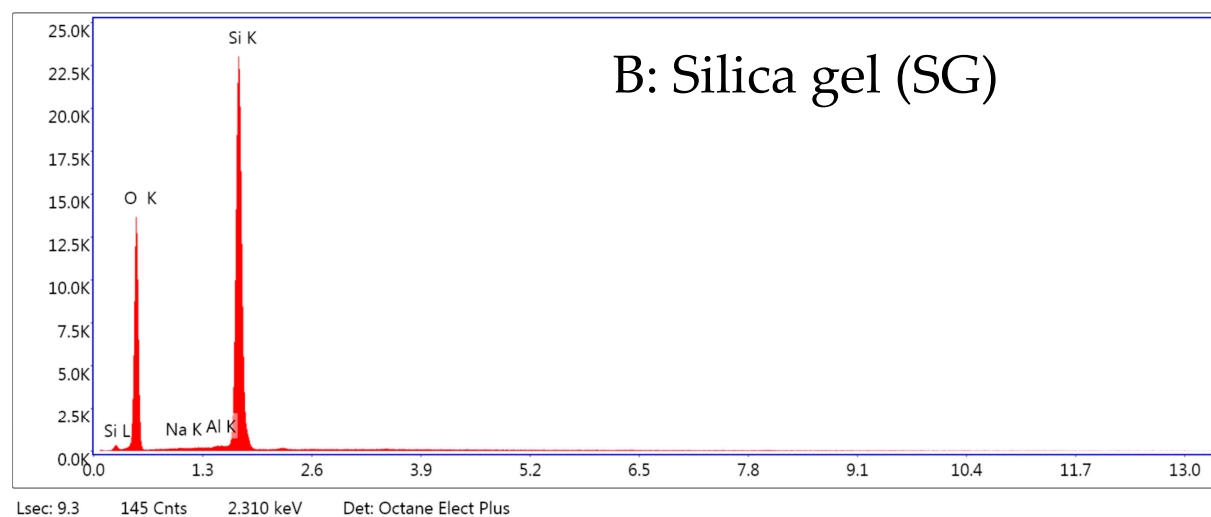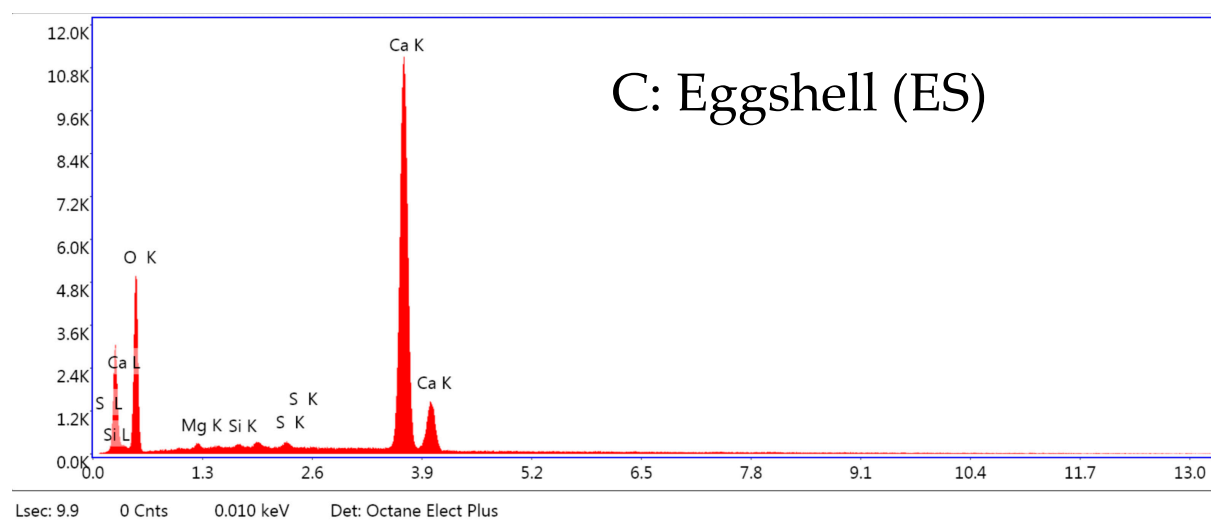

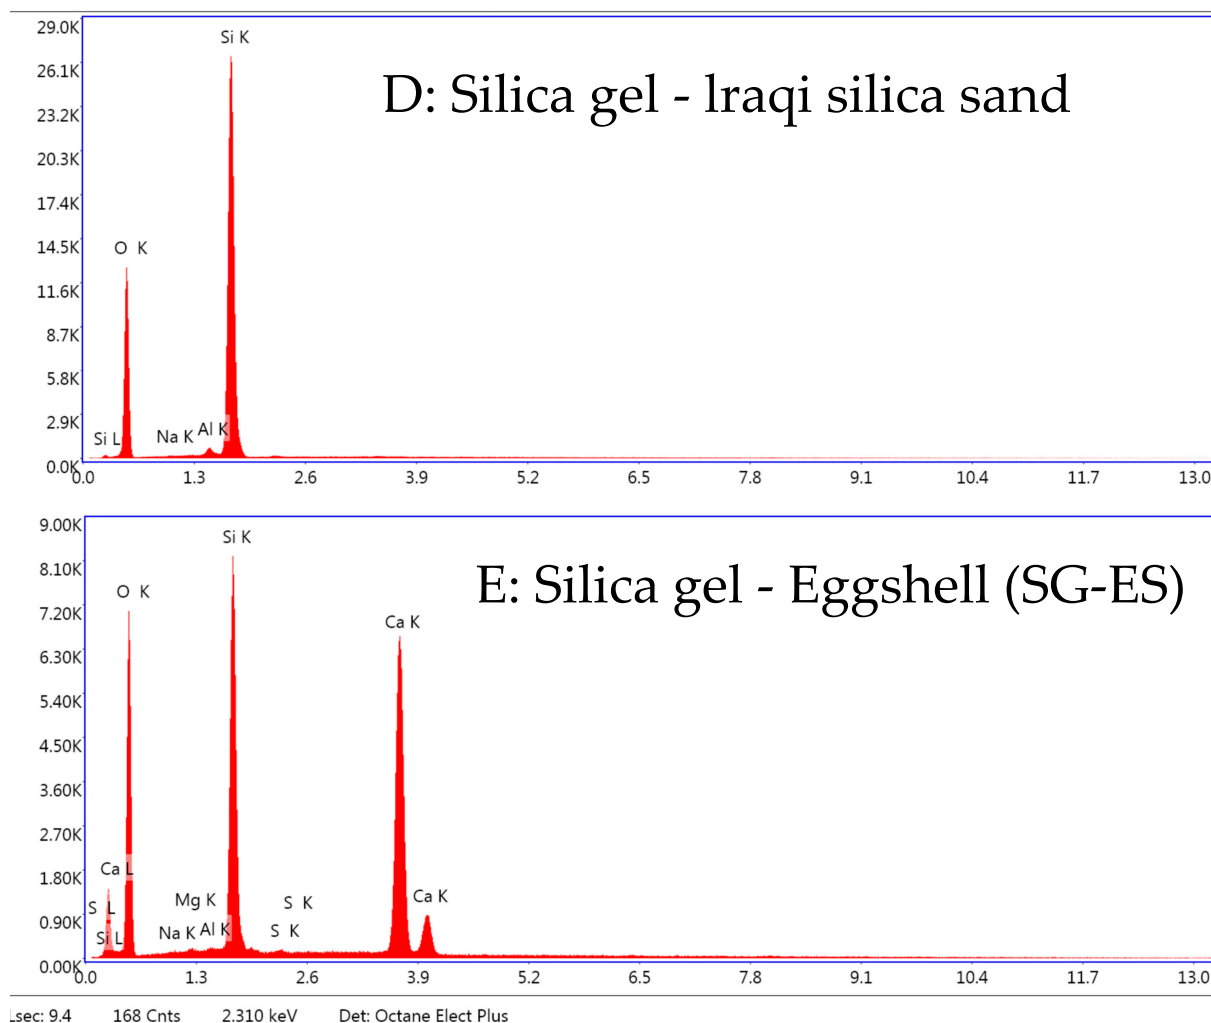

**Figure S1.** EDX records of adsorbent material studied.

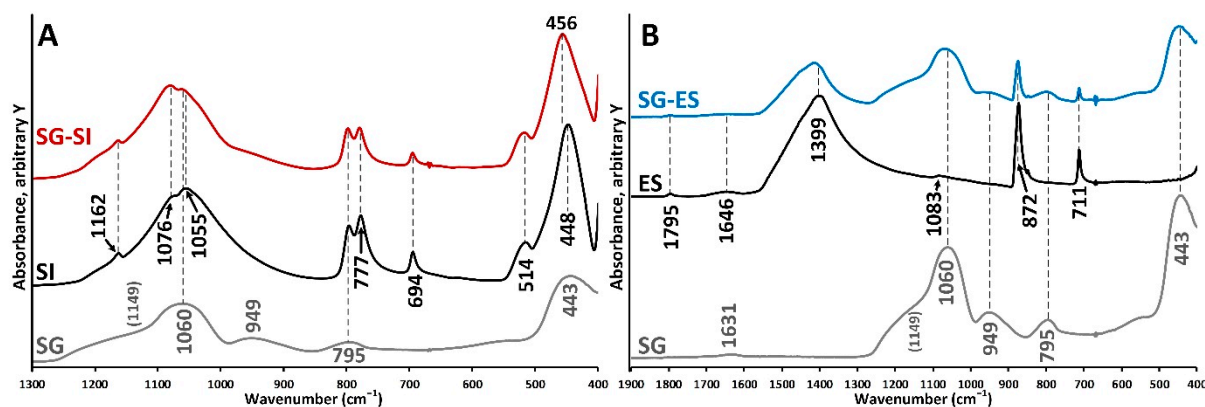

**Figure S2.** FTIR-ATR spectra of the SG-SI (A) and SG-ES (B) adsorbent mixtures and their constituents in the 1300/1900–400  $\text{cm}^{-1}$  spectral region.

**Table S1.** Data from thermo-analytical measurements.

| Sample                               | Stage                                                           | T <sub>initial</sub><br>(°C) | T <sub>end</sub><br>(°C) | Mass Loss Step  | DTA Signal    |
|--------------------------------------|-----------------------------------------------------------------|------------------------------|--------------------------|-----------------|---------------|
| Silica sand<br>Figure 8A.            | I.                                                              | 20                           | 200                      | 0.2 mg (0.2%)   | -             |
|                                      | II.                                                             | 200                          | 500                      | 0.3 mg (0.3%)   | -             |
|                                      | III.                                                            | 500                          | 720                      | 0.1 mg (0.1%)   | -             |
|                                      | IV.                                                             | 720                          | 1000                     | 0.2 mg (0.2%)   | -             |
|                                      | <b>Initial mass: 100.9 mg Total mass loss: 0.81 mg (0.8%)</b>   |                              |                          |                 |               |
| Silica gel<br>Figure 8B.             | I.                                                              | 22                           | 265                      | 8.1 mg (8%)     | endothermic   |
|                                      | II.                                                             | 265                          | 800                      | 5 mg (5%)       | endothermic   |
|                                      | III.                                                            | 800                          | 1000                     | 0.8 mg (0.8%)   | -             |
|                                      | <b>Initial mass: 100.7 mg Total mass loss: 13.94 mg (13.8%)</b> |                              |                          |                 |               |
| Eggshell<br>Figure 8C.               | I.                                                              | 21                           | 200                      | 0.4 mg (0.4%)   | endothermic   |
|                                      | II.                                                             | 200                          | 480                      | 3.2 mg (3.2%)   | exothermic    |
|                                      | III.                                                            | 480                          | 670                      | 1.0 mg (1.0%)   | (endothermic) |
|                                      | IV.                                                             | 670                          | 1000                     | 41.7 mg (41.3%) | endothermic   |
|                                      | <b>Initial mass: 100.9 mg Total mass loss: 46.31 mg (45.9%)</b> |                              |                          |                 |               |
| Silica sand/Silica gel<br>Figure 8D. | I.                                                              | 20                           | 240                      | 2.7 mg (2.7%)   | endothermic   |
|                                      | II.                                                             | 240                          | 790                      | 2.9 mg (2.9%)   | (endothermic) |
|                                      | III.                                                            | 790                          | 1000                     | 0.5 mg (0.5%)   | -             |
|                                      | <b>Initial mass: 101 mg Total mass loss: 6.16 mg (6.1%)</b>     |                              |                          |                 |               |
| Eggshell/Silica gel<br>Figure 8E.    | I.                                                              | 20                           | 200                      | 1.4 mg (1.4%)   | endothermic   |
|                                      | II.                                                             | 200                          | 480                      | 2.8 mg (2.8%)   | exothermic    |
|                                      | III.                                                            | 480                          | 670                      | 1.9 mg (1.9%)   | (endothermic) |
|                                      | IV.                                                             | 670                          | 1000                     | 21.3 mg (21.2%) | endothermic   |
|                                      | <b>Initial mass: 100.6 mg Total mass loss: 27.46 mg (27.3%)</b> |                              |                          |                 |               |

**SI-Y1 - Calculation of CaCO<sub>3</sub> content of the Eggshell sample based on results of thermal analysis**

Initial sample mass: 100.9 mg

Adsorbed water content: 0.4 mg (21–200°C)

Dry sample: 100.5 mg

Mass loss observed for the thermal decomposition of calcite: 41.67 mg (670–1000°C)

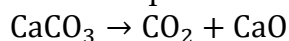

According to stoichiometry 94.78 mg CaCO<sub>3</sub> is required for the liberation of 41.67 mg CO<sub>2</sub>

Calculated CaCO<sub>3</sub> content can be given relative to the dry sample mass: 94.32%

**SI-Y3 - Calculation of CaCO<sub>3</sub> content of the Eggshell/Silica gel sample based on results of thermal analysis**

Initial sample mass: 100.6 mg

Adsorbed water content: 1.4 mg (21–200°C)

Dry sample: 99.2 mg

Mass loss observed for the thermal decomposition of calcite: 21.33 mg (670–1000°C)



According to stoichiometry 48.51 mg CaCO<sub>3</sub> is required for the liberation of 21.33 mg CO<sub>2</sub>

Calculated CaCO<sub>3</sub> content can be given relative to the dry sample mass: 48.90%

Since the CaCO<sub>3</sub> content of the dry Eggshell sample was found to be 94.32% (SI-Y1), therefore 48.90% of calcite is expected to be found if 51.85% of the dry sample is constituted of eggshell.
